# Supplementary material
Source: PubMed Central journal article supplement (PMC10035559)
Supplement: NIHMS1877793-supplement-1.pdf [file NIHMS1877793-supplement-1.pdf]

**Supplement 1a. Hierarchical Linear Modeling of Sleep Quality and ACEs Mid and Late in Pregnancy**

|                                | Mid Pregnancy (20 weeks GA) | Late Pregnancy (30 weeks GA) |
|--------------------------------|-----------------------------|------------------------------|
| <b>Fixed Effects</b>           | <i>b</i>                    | <i>b</i>                     |
| Intercept ( $b_0$ )            | 6.44                        | 6.89                         |
| ACEs ( $b_{01}$ )              | 0.37**                      | 0.32*                        |
| Linear Slope ( $b_1$ )         | -0.006                      | 0.09***                      |
| ACEs ( $b_{11}$ )              | -0.002                      | -0.006                       |
| Quadratic Growth ( $b_2$ )     | 0.005**                     | 0.005**                      |
| ACEs ( $b_{21}$ )              | -0.0002                     | -0.0002                      |
| <b>Random Effects</b>          |                             |                              |
| Error ( $\sigma^2_e$ )         | 2.59                        | 2.59                         |
| Intercept ( $\sigma^2_{b_0}$ ) | 8.86***                     | 9.54***                      |
| Slope ( $\sigma^2_{b_1}$ )     | 0.009***                    | 0.009***                     |

Notes: \* $p < .05$ , \*\* $p < .01$ , \*\*\* $p < .001$ . GA = Gestational age. Intercept centered at 20 and 30 gestational weeks for mid and late in pregnancy respectively.

**Supplement 1b. Hierarchical Linear Modeling of Sleep Quality and BCEs Mid and Late in Pregnancy**

|                                | Mid Pregnancy (20 weeks GA) | Late Pregnancy (30 weeks GA) |
|--------------------------------|-----------------------------|------------------------------|
| <b>Fixed Effects</b>           | <i>b</i>                    | <i>b</i>                     |
| Intercept ( $b_0$ )            | 7.69                        | 7.94                         |
| BCEs ( $b_{01}$ )              | -0.74***                    | -0.61***                     |
| Linear Slope ( $b_1$ )         | -0.03                       | 0.076*                       |
| BCEs ( $b_{11}$ )              | 0.01                        | 0.014                        |
| Quadratic Growth ( $b_2$ )     | 0.005*                      | 0.005*                       |
| BCEs ( $b_{21}$ )              | 0.0001                      | 0.0002                       |
| <b>Random Effects</b>          |                             |                              |
| Error ( $\sigma^2_e$ )         | 2.64                        | 2.64                         |
| Intercept ( $\sigma^2_{b_0}$ ) | 8.39***                     | 9.39***                      |
| Slope ( $\sigma^2_{b_1}$ )     | 0.008***                    | 0.008***                     |

Notes: \* $p < .05$ , \*\* $p < .01$ , \*\*\* $p < .001$ . GA = Gestational age. Intercept centered at 20 and 30 gestational weeks for mid and late in pregnancy respectively.

**Supplement 2a. Hierarchical Linear Modeling of Sleep Quality and ACEs with Obstetric Complications as Covariate**

| <b>Fixed Effects</b>                        | <i>b</i> |
|---------------------------------------------|----------|
| Intercept ( $b_0$ )                         | 7.17     |
| ACEs ( $b_{01}$ )                           | 0.37**   |
| Prenatal Stressful Life Events ( $b_{02}$ ) | -0.10    |
| INR ( $b_{03}$ )                            | -0.12    |
| Obstetric Complications ( $b_{04}$ )        | -0.05    |
| Linear Slope ( $b_1$ )                      | -0.12*   |
| Quadratic Growth ( $b_2$ )                  | 0.005**  |
| <b>Random Effects</b>                       |          |
| Error ( $\sigma^2_e$ )                      | 2.76     |
| Intercept ( $\sigma^2_{b_0}$ )              | 8.98***  |
| Slope ( $\sigma^2_{b_1}$ )                  | 0.01***  |

Notes: \* $p < .05$ , \*\* $p < .01$ , \*\*\* $p < .001$ .

**Supplement 2b. Hierarchical Linear Modeling of Sleep Quality and BCEs with Obstetric Complications as Covariate**

| <b>Fixed Effects</b>                        | <i>b</i> |
|---------------------------------------------|----------|
| Intercept ( $b_0$ )                         | 8.55     |
| BCEs ( $b_{01}$ )                           | -0.71*** |
| Prenatal Stressful Life Events ( $b_{02}$ ) | -0.04    |
| INR ( $b_{03}$ )                            | -0.08    |
| Obstetric Complications ( $b_{04}$ )        | 0.05     |
| Linear Slope ( $b_1$ )                      | -0.15*   |
| Quadratic Growth ( $b_2$ )                  | 0.005**  |
| <b>Random Effects</b>                       |          |
| Error ( $\sigma^2_e$ )                      | 2.78     |
| Intercept ( $\sigma^2_{b_0}$ )              | 7.99***  |
| Slope ( $\sigma^2_{b_1}$ )                  | 0.01***  |

Notes: \* $p < .05$ , \*\* $p < .01$ , \*\*\* $p < .001$ .
